# Supplementary material
Source: Springer Nature journal article supplement (https://www.springermedizin.de/resource/supplementary/12916_2012_592_MOESM4_ESM.pdf/9597912)

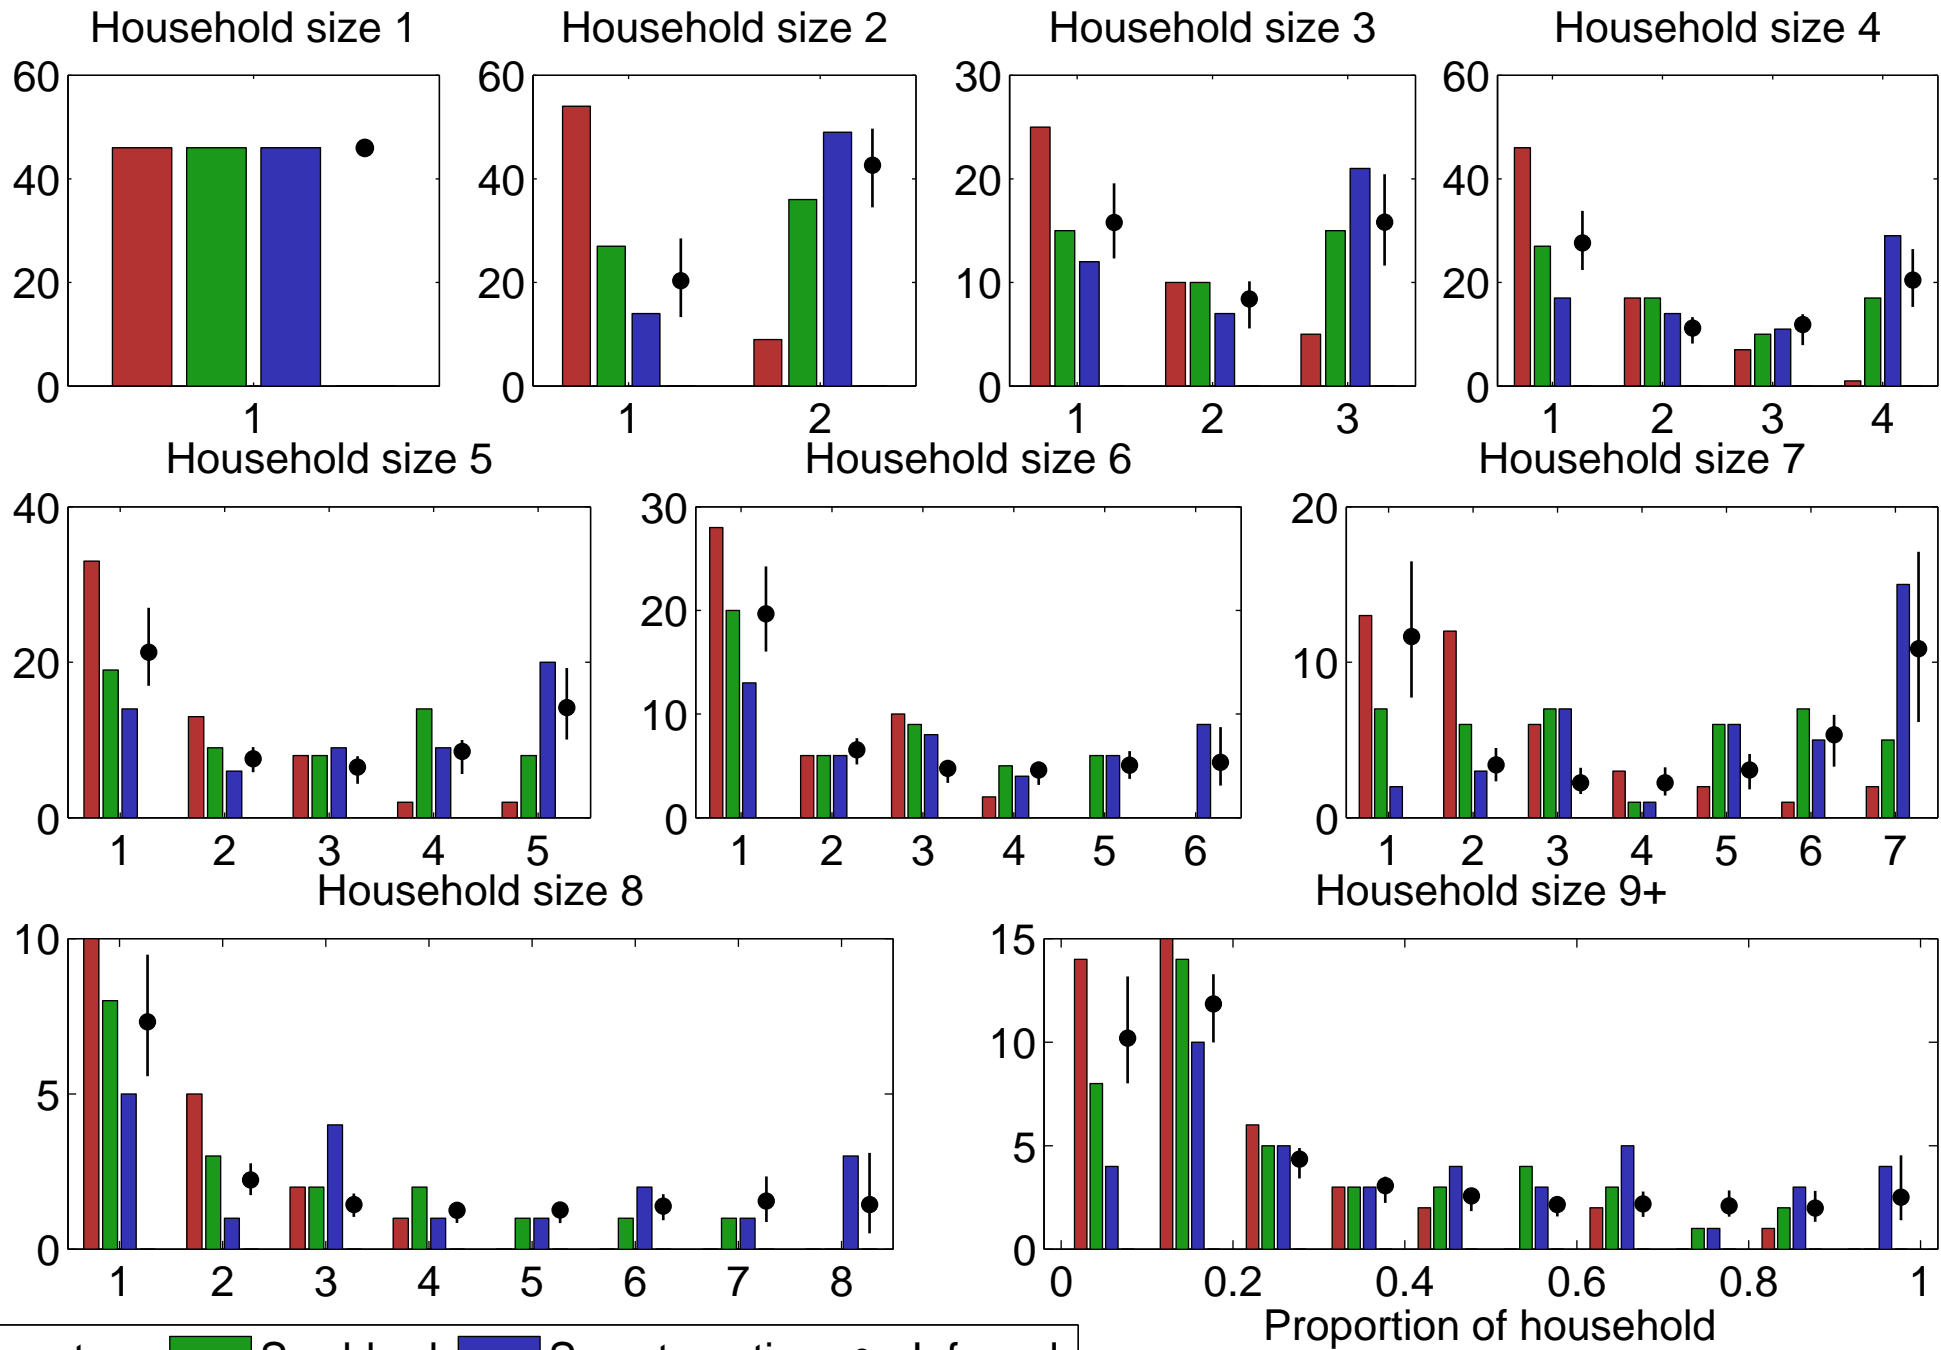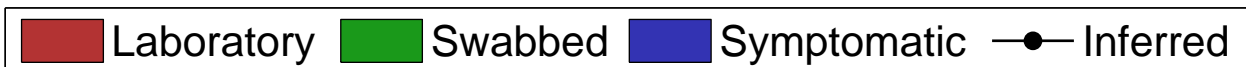

Proportion of household

Supplement: MOESM4 [file 9597912]
